# Supplementary material for: miR-183-5p Is a Potential Molecular Marker of Systemic Lupus Erythematosus
Source: Hindawi journal article supplement (doi:10.1155/2021/5547635), 2021-05-06
Supplement: f1 [file 5547635.f1.pdf]

**Supplementary Table 1. Reverse transcription gene specific primer and PCR primer sequences**

| PCR Target      |                             | Primer sequence (5'---3')                           |
|-----------------|-----------------------------|-----------------------------------------------------|
| U6              | Reverse ranscription primer | GTCGTATCCAGTGCAGGGTCCGAGGTATTTCGCACTGGATACGACAAAATA |
|                 | Forward Primer              | AGAGAAGATTAGCATGGCCCCTG                             |
|                 | Reverse primer              | GTCGTATCCAGTGCAGGGTCCGAGGTATTTCGCACTGGATACGACAAAATA |
| hsa-miR-1-3p    | Reverse ranscription primer | GTCGTATCCAGTGCAGGGTCCGAGGTATTTCGCACTGGATACGACATACAT |
|                 | Forward Primer              | GCGCGTGGAATGTAAAGAAGT                               |
|                 | Reverse primer              | AGTGCAGGGTCCGAGGTATT                                |
| hsa-miR-183-5p  | Reverse ranscription primer | GTCGTATCCAGTGCAGGGTCCGAGGTATTTCGCACTGGATACGACAGTGAA |
|                 | Forward Primer              | CGCGTATGGCACTGGTAGAA                                |
|                 | Reverse primer              | AGTGCAGGGTCCGAGGTATT                                |
| hsa-miR-374b-3p | Reverse ranscription primer | GTCGTATCCAGTGCAGGGTCCGAGGTATTTCGCACTGGATACGACAATGAT |
|                 | Forward Primer              | CGCGCTTAGCAGGTTGTATT                                |
|                 | Reverse primer              | AGTGCAGGGTCCGAGGTATT                                |
| hsa-miR-19b-3p  | Reverse ranscription primer | GTCGTATCCAGTGCAGGGTCCGAGGTATTTCGCACTGGATACGACTCAGTT |
|                 | Forward Primer              | CGTGTGCAAATCCATGCAA                                 |
|                 | Reverse primer              | AGTGCAGGGTCCGAGGTATT                                |
| Gapdh           | Forward Primer              | CAGGAGGCATTGCTGATGAT                                |
|                 | Reverse primer              | GAAGGCTGGGGCTCATTT                                  |
| Foxo1           | Forward Primer              | CTACGAGTGGATGGTCAAGAGC                              |
|                 | Reverse primer              | CAGTTCCTTCATTCTGCACACG                              |
